# Supplementary material for: Sample pooling methods for efficient pathogen screening: Practical implications
Source: PubMed Central journal article supplement (PMC7657563; doi:10.1371/journal.pone.0236849), 2020-11-11
Supplement: pone.0236849.s001.pdf [file pone.0236849.s001.pdf]

S1 Table: Summary of parameters and calculations used in simulations for each pooling method.

| Method                             | Class                                                                                                                                                                                                                                                                        | Parameters                                                                                                                   | No. Tests                                                                                                                                                                                                                                                                                   | No. Steps                                                                         | No. Pipettings                                                                                                                                                                 |
|------------------------------------|------------------------------------------------------------------------------------------------------------------------------------------------------------------------------------------------------------------------------------------------------------------------------|------------------------------------------------------------------------------------------------------------------------------|---------------------------------------------------------------------------------------------------------------------------------------------------------------------------------------------------------------------------------------------------------------------------------------------|-----------------------------------------------------------------------------------|--------------------------------------------------------------------------------------------------------------------------------------------------------------------------------|
| <b>DNA Sudoku</b>                  | Non-adaptive                                                                                                                                                                                                                                                                 | <p>96 Samples:</p> $w = 2 : 6$<br>$\mathbf{W} = [10, 11, 13, 17, 19, 23]$<br>Ex: $\mathbf{W}_{w=2} = [10, 11]$               | $T = \sum_{i=1}^w W_i > w\sqrt{N} +  \text{Ambiguous samples} $                                                                                                                                                                                                                             | $S = 1$ if $k \leq \hat{k}$ (unambiguous)<br>$S = 2$ if $k > \hat{k}$ (ambiguous) | $P = N \times w +  \text{Ambiguous Samples} $                                                                                                                                  |
|                                    | <p>384 Samples:</p> $w = 2 : 10$<br>$\mathbf{W} = [20, 21, 23, 29, 31, 37, 41, 43, 47, 53]$                                                                                                                                                                                  |                                                                                                                              |                                                                                                                                                                                                                                                                                             |                                                                                   |                                                                                                                                                                                |
|                                    | <p>1,536 Samples</p> $w = 2 : 21$<br>$\mathbf{W} = [40, 41, 43, 47, 49, 51, 53, 59, 61, 67, 71, 73, 79, 83, 89, 97, 101, 103, 107, 109, 113]$                                                                                                                                |                                                                                                                              |                                                                                                                                                                                                                                                                                             |                                                                                   |                                                                                                                                                                                |
| <b>2D Pooling</b>                  | Non-adaptive                                                                                                                                                                                                                                                                 | <p>96 Samples (MxDxD Grids)</p> $11 \times 3 \times 3, 6 \times 4 \times 4,$<br>$4 \times 5 \times 5, 1 \times 10 \times 10$ | $T = 2DM$                                                                                                                                                                                                                                                                                   | $S = 1$ if unambiguous<br>$S = 2$ if ambiguous                                    | $P = \sum_{i=1}^{2DM} \left\lfloor \frac{n_i}{c} \right\rfloor$<br>where $n_i$ is the number of samples in each row or column and $c$ is the number of channels in the pipette |
|                                    | <p>284 Samples:</p> $43 \times 3 \times 3, 24 \times 4 \times 4,$<br>$16 \times 5 \times 5, 8 \times 7 \times 7,$<br>$4 \times 10 \times 10, 1 \times 20 \times 20$                                                                                                          |                                                                                                                              |                                                                                                                                                                                                                                                                                             |                                                                                   |                                                                                                                                                                                |
|                                    | <p>1,536 Samples:</p> $171 \times 3 \times 3, 96 \times 4 \times 4,$<br>$62 \times 5 \times 5, 43 \times 6 \times 6,$<br>$32 \times 7 \times 7, 24 \times 8 \times 8,$<br>$16 \times 10 \times 10, 8 \times 14 \times 14,$<br>$4 \times 20 \times 20, 1 \times 40 \times 40$ |                                                                                                                              |                                                                                                                                                                                                                                                                                             |                                                                                   |                                                                                                                                                                                |
| <b>S-Stage</b>                     | Hybrid/<br>multistage<br>adaptive                                                                                                                                                                                                                                            | $k = 1 - 20$<br>$\hat{k} = 1 - 20$<br>$k \times \hat{k}$                                                                     | $T = \sum_{i=1}^s g_i \leq \frac{N}{n_1} + \frac{kn_1}{n+2} + \dots + \frac{kn_{s-2}}{n_{s-1}} + kn_{s-1}$<br>where $g_i = \left\lfloor \frac{N_i}{n_i} \right\rfloor$ is the number of groups tested at each step<br>and $n_i = \frac{N}{k^{i-1}}$ is the number of samples per group.     | $S = \ln \left( \frac{N}{\hat{k}} \right)$                                        | $P = \sum_{i=1}^S g_i \left\lfloor \frac{n_i}{c} \right\rfloor$                                                                                                                |
| <b>Modified 3-Stage</b>            | Hybrid/<br>multistage<br>adaptive                                                                                                                                                                                                                                            | $k = 1 - 20$<br>$\hat{k} = 1 - 20$<br>$k \times \hat{k}$                                                                     | $T = \sum_{i=1}^s g_i \leq \frac{N}{n_1} + \frac{kn_1}{n+2} + \dots + \frac{kn_{s-2}}{n_{s-1}} + kn_{s-1}$<br>where $g_i = \left\lfloor \frac{n_i}{n_{i+1}} \right\rfloor$ is the number of groups tested at each step<br>and $n_i = \frac{N}{k^{i-1}}$ is the number of samples per group. | $S = \min \left( 3, \left\lceil \ln \frac{N}{\hat{k}} \right\rceil \right)$       | $P = \sum_{i=1}^S g_i \left\lfloor \frac{n_i}{c} \right\rfloor$                                                                                                                |
| <b>Binary Splitting by Halving</b> | Adaptive                                                                                                                                                                                                                                                                     | $k = 1 - 20$                                                                                                                 | $T \approx k \log_2 N$                                                                                                                                                                                                                                                                      | $S = T$                                                                           | $P = \sum_{i=1}^S \left\lfloor \frac{n_i}{c} \right\rfloor$                                                                                                                    |
| <b>Gen. Binary Splitting</b>       | Adaptive                                                                                                                                                                                                                                                                     | $k = 1 - 20$<br>$\hat{k} = 1 - 20$<br>$k \times \hat{k}$                                                                     | $T \approx k \log_2 \left( \frac{n}{\hat{k}} \right)$                                                                                                                                                                                                                                       | $S \approx T$                                                                     | $P = \sum_{i=1}^S g_i \left\lfloor \frac{n_i}{c} \right\rfloor$<br>where $g_i = N_i$ if $N_i \leq 2\hat{k} - 2$ else 1                                                         |
