# Supplementary material for: Sample pooling methods for efficient pathogen screening: Practical implications
Source: PubMed Central journal article supplement (PMC7657563; doi:10.1371/journal.pone.0236849), 2020-11-11

**N = 96****N = 384****N = 1536**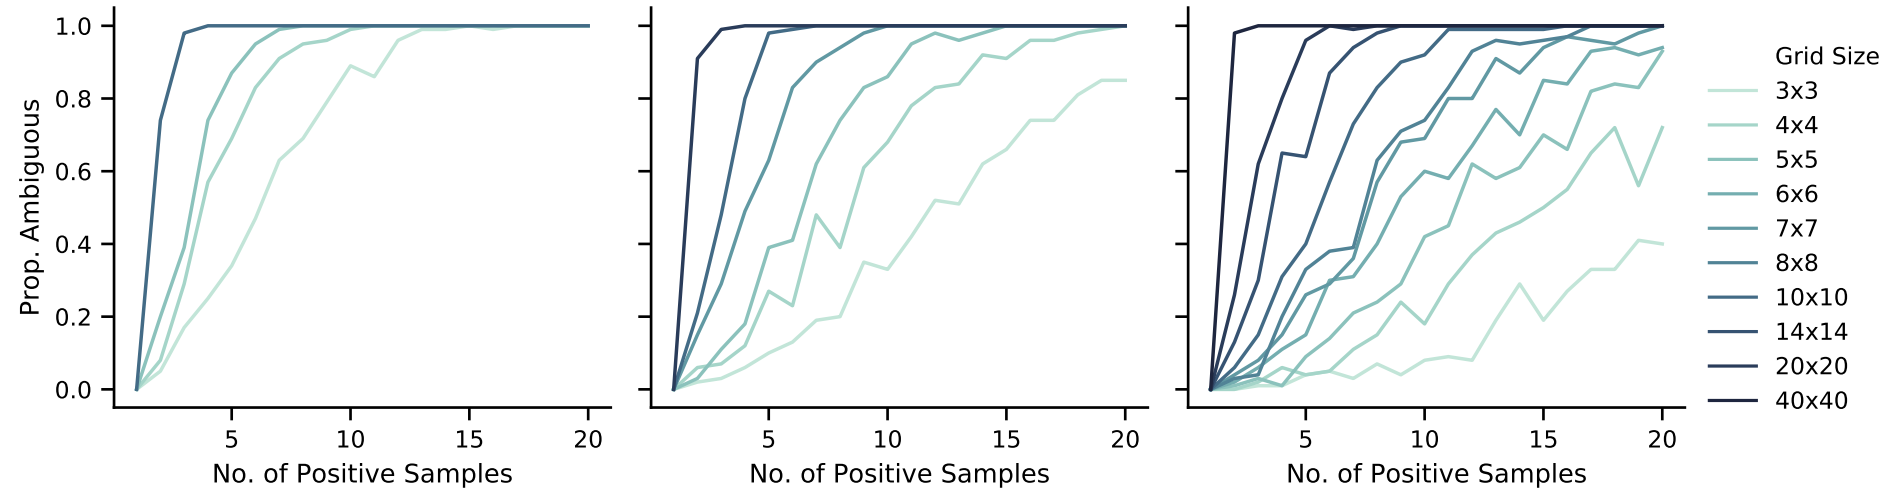

Supplement: pone.0236849.s003.pdf [file pone.0236849.s003.pdf]
