# Supplementary material for: Sample pooling methods for efficient pathogen screening: Practical implications
Source: PubMed Central journal article supplement (PMC7657563; doi:10.1371/journal.pone.0236849), 2020-11-11

# 96 Samples

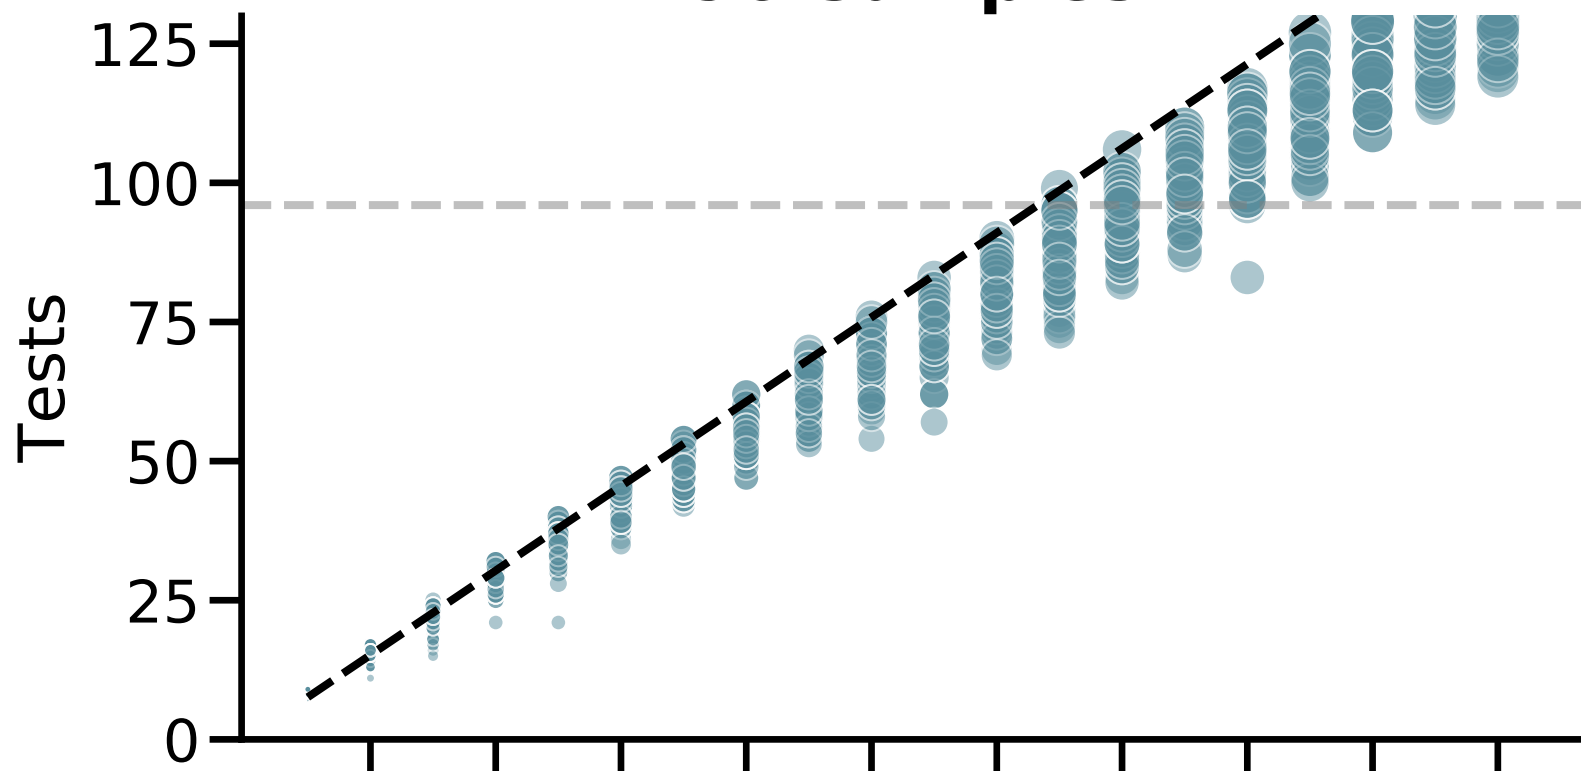

# 384 Samples

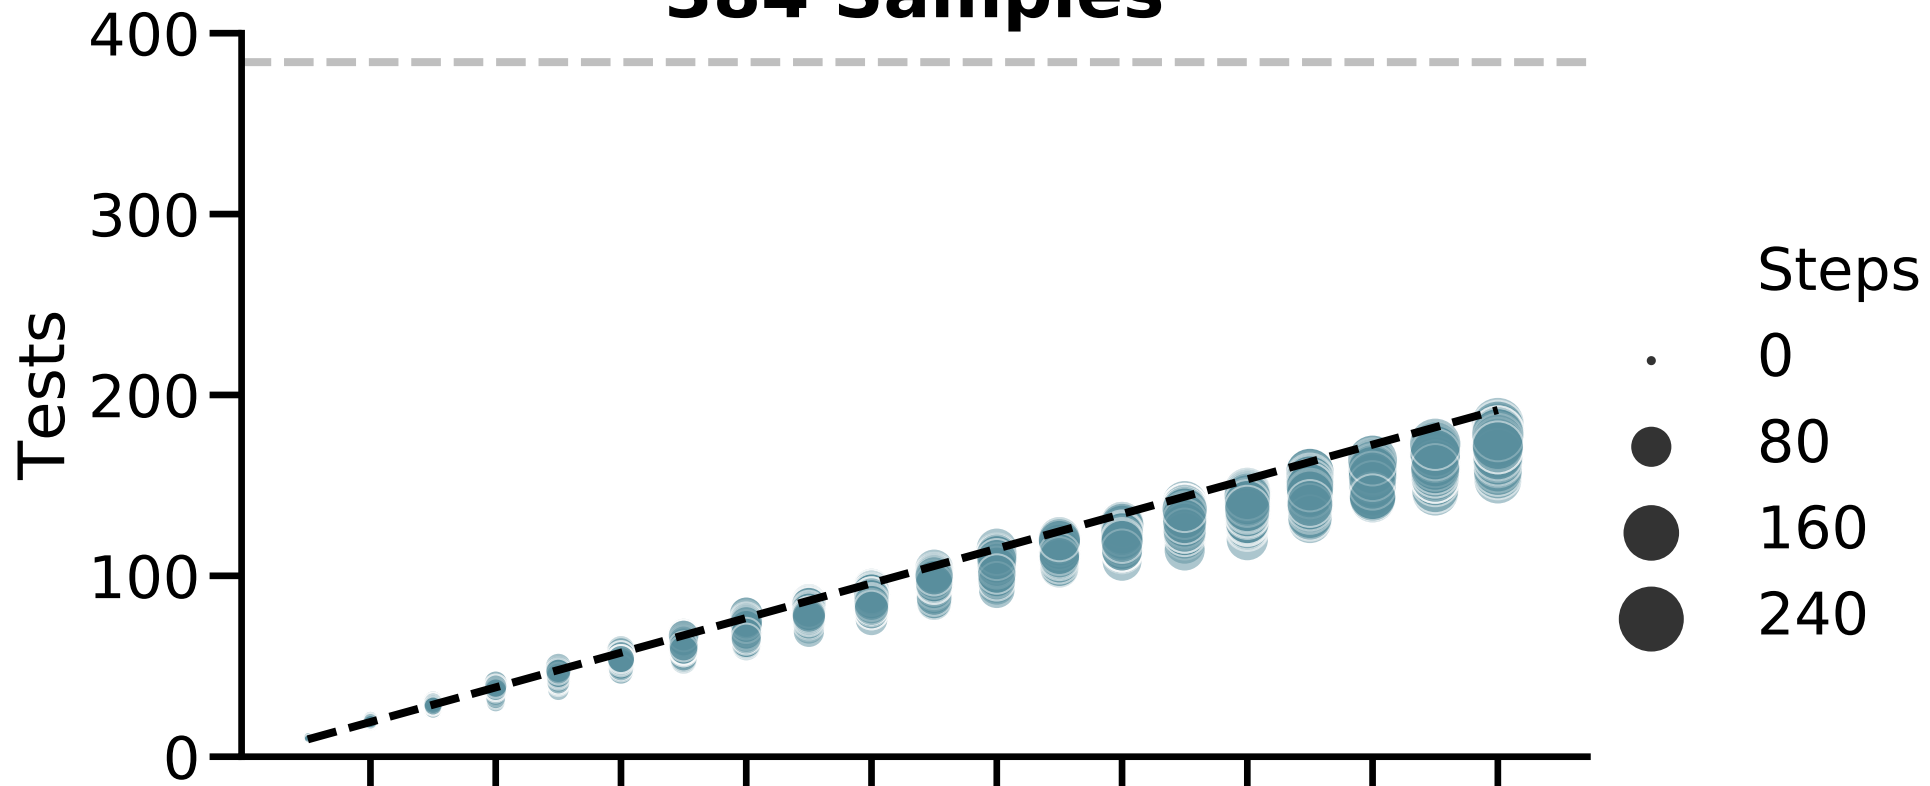

# 1536 Samples

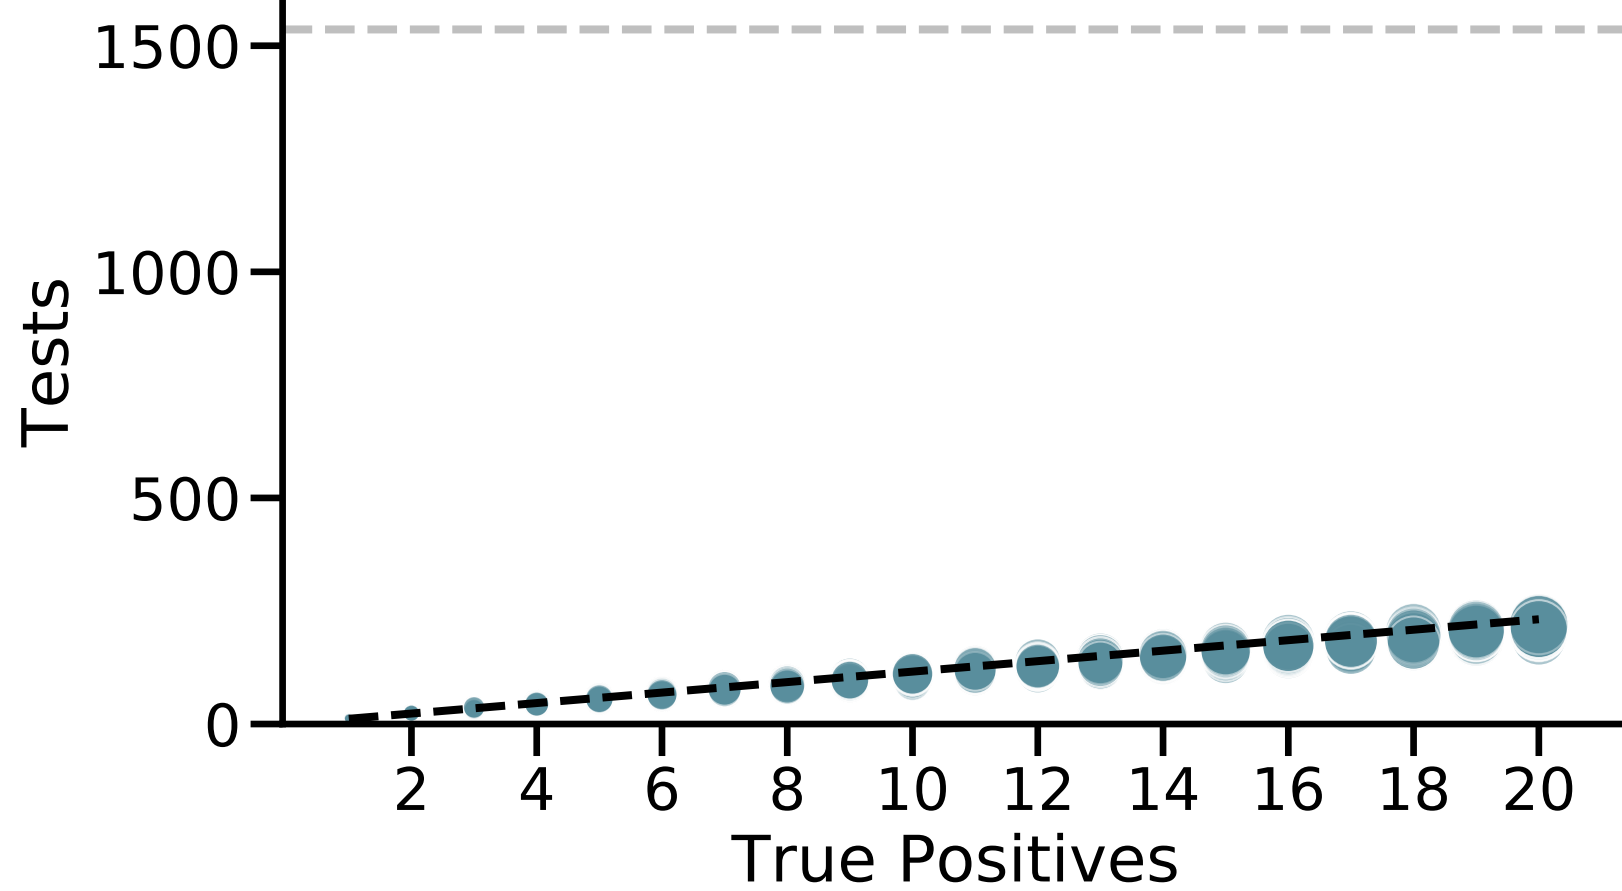

Supplement: pone.0236849.s005.pdf [file pone.0236849.s005.pdf]
